# Supplementary material for: Syntheses, structures, photoluminescence, and magnetic properties of (3,6)- and 4-connected lanthanide metal–organic frameworks with a semirigid tricarboxylate ligand
Source: Royal Society of Chemistry journal article supplement (doi:10.1039/c2dt12346k), 2012-01-01
Supplement: c2dt12346k.pdf [file c2dt12346k.pdf]

## Supplementary Information

### Syntheses, structures, photoluminescence, and magnetic properties of (3,6)- and 4-connected lanthanide metal-organic frameworks with a semi-rigid tricarboxylate ligand

Shengqun Su<sup>ab</sup>, Song Wang<sup>ab</sup>, Xuezhi Song<sup>ab</sup>, Shuyan Song<sup>a</sup>, Chao Qin<sup>a</sup>, Min Zhu<sup>ab</sup>, Zhaomin

Hao<sup>ab</sup>, Shuna Zhao<sup>ab</sup>, Hongjie Zhang<sup>\*a</sup>

<sup>a</sup> State Key Laboratory of Rare Earth Resource Utilizations, Changchun Institute of Applied Chemistry,

Chinese Academy of Sciences, Changchun 130022, P. R. China.

Tel.: +86 431 85262127; fax: +86 431 85698041. E-mail address: hongjie@ciac.jl.cn (H.-J. Zhang).

<sup>b</sup> Graduate School of the Chinese Academy of Sciences, Beijing, 100039, P. R. China.

| Compound | D-H...A                          | d(D-H) | d(H...A) | d(D...A) | ∠(D-H...A) |
|----------|----------------------------------|--------|----------|----------|------------|
| 7'       | O12-H12C...O7 [x-1, y, z-1]      | 0.821  | 1.968    | 2.687    | 145.81     |
|          | O12-H12B...O3 [x, y, z-1]        | 0.821  | 2.249    | 3.009    | 154.05     |
|          | O12-H12B...O9 [x, y, z-1]        | 0.821  | 2.569    | 3.055    | 119.17     |
|          | O11-H11B...O7 [-x+1, -y+1, -z+2] | 0.820  | 1.967    | 2.754    | 160.63     |
|          | O11-H11C...O10                   | 0.820  | 2.333    | 2.929    | 130.11     |
|          | O11-H11C...O8 [-x, -y+1, -z+2]   | 0.820  | 2.432    | 3.033    | 130.87     |
|          | O10-H10C...O1 [-x, -y+1, -z+2]   | 0.819  | 2.266    | 2.798    | 123.08     |
|          | O10-H10B...O1 [x-1, y, z]        | 0.819  | 2.074    | 2.812    | 149.82     |

Table. S1 Hydrogen-bond geometries for compounds 7' (in Å and °).

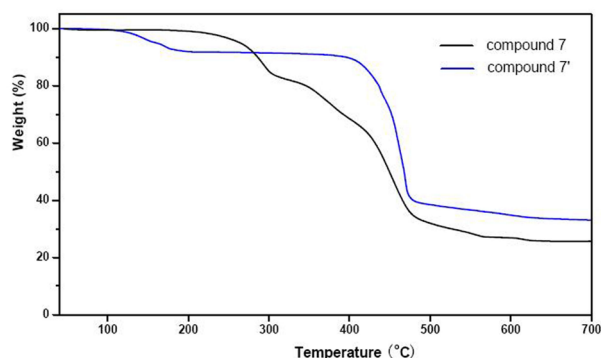

Fig. S1. TGA curves of 7 and 7'.

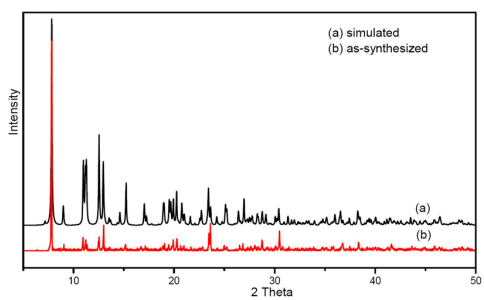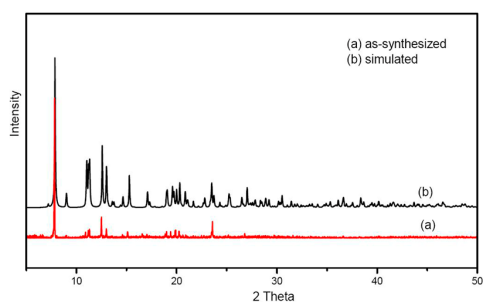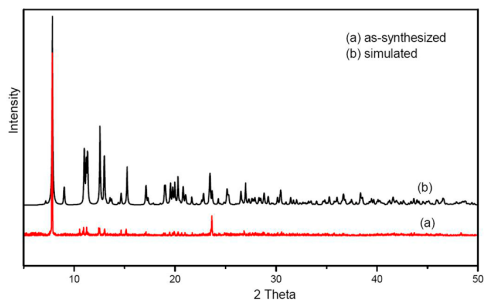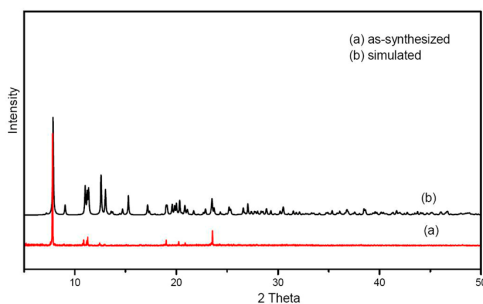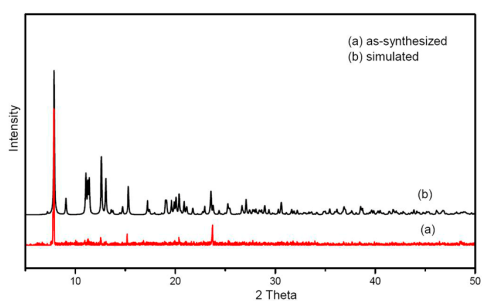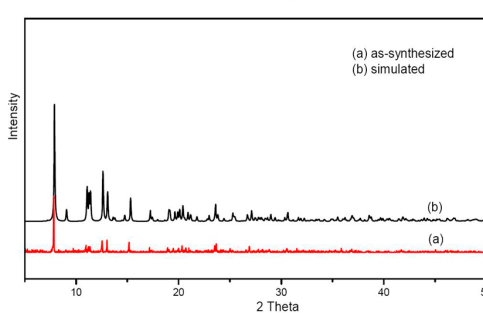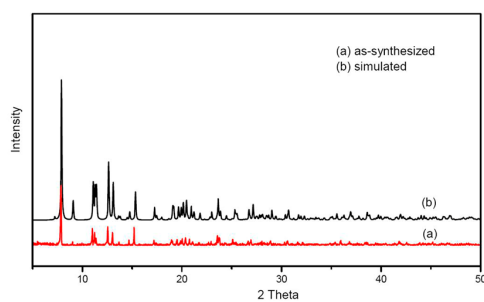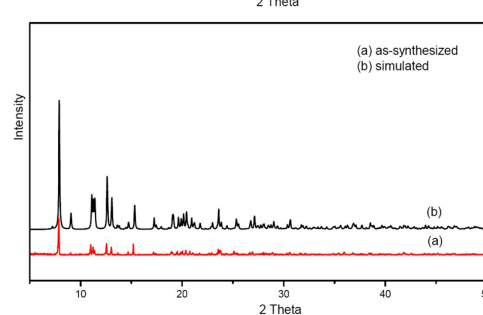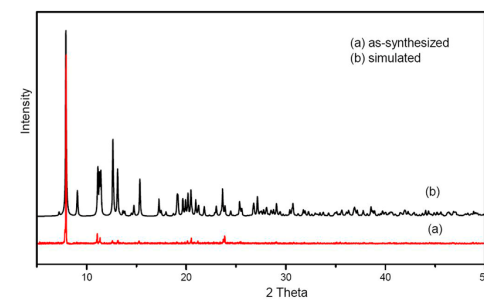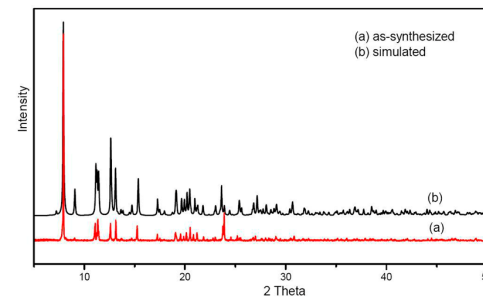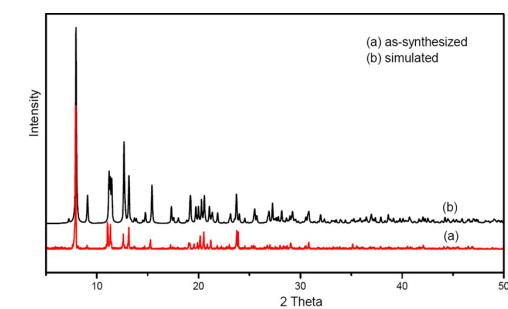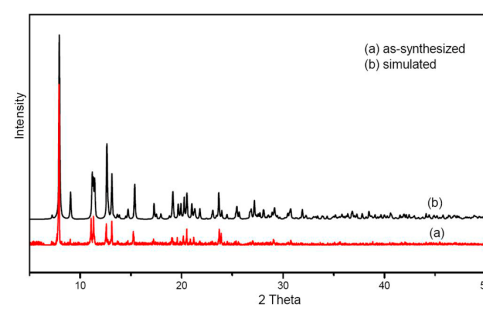

**Fig. S2.** The X-ray powder diffraction patterns for **1-12**.

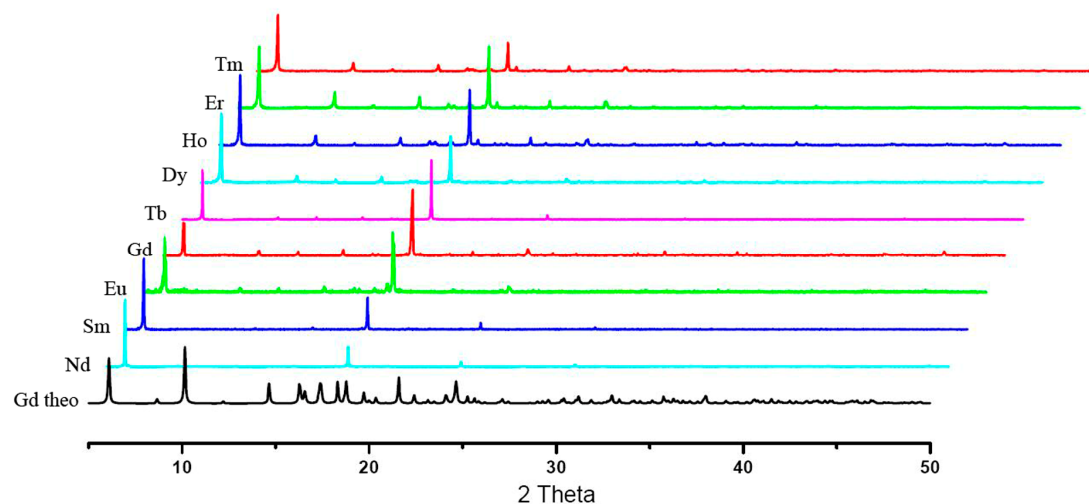

**Fig. S3.** The X-ray powder diffraction patterns for **7'** and  $[\text{Ln}(\text{L})(\text{H}_2\text{O})_3]$  (Ln = Nd, Sm, Eu, Tb, Dy, Ho, Er, Tm).

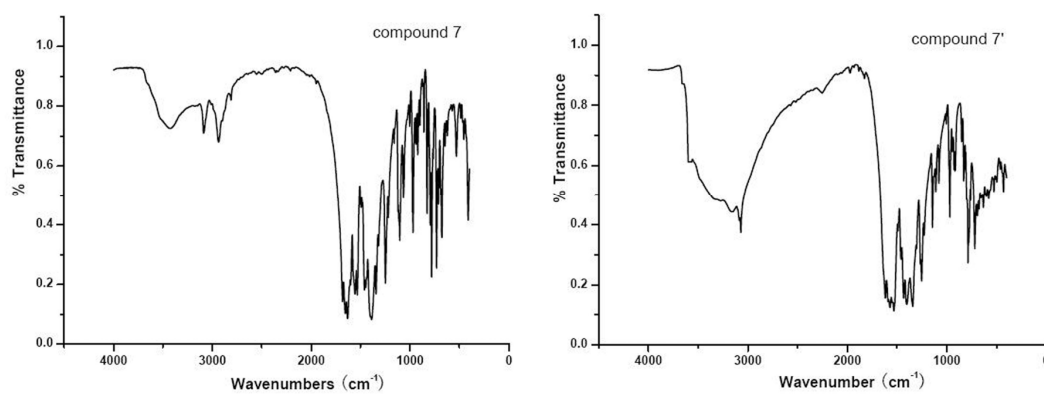

**Fig. S4.** IR spectra of **7** and **7'**.

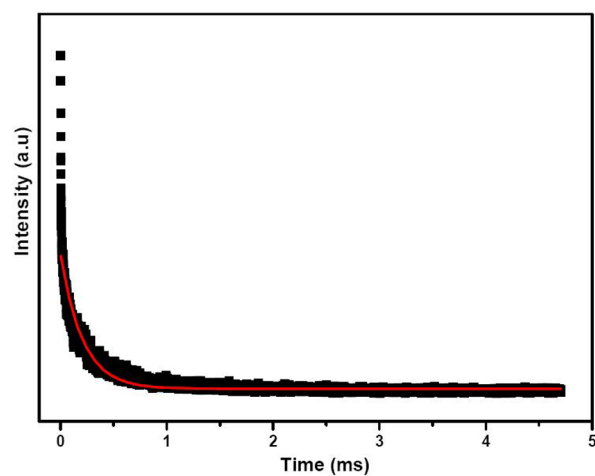

**Fig. S5.** The luminescent decay curves of **6** at room temperature.
